# Supplementary material for: Volume targeted versus pressure support non-invasive ventilation in patients with super obesity and chronic respiratory failure: a randomised controlled trial
Source: HighWire-hosted journal article supplement (doi:10.1136/thoraxjnl-2011-201081), 2012-03-01
Supplement: thoraxjnl-2011-201081-s1.pdf [file thoraxjnl-2011-201081-s1.pdf]

# Randomisation

## AVAPS

IPAP = EPAP+4 – 30cmH<sub>2</sub>O  
EPAP = 8 – 10  
Vte = 8 – 10ml/kg (ideal weight)  
Ti 30-50% cycle  
Back up rate = Resting rate - 4

## PS

IPAP = 18 – 22cmH<sub>2</sub>O  
EPAP = 8 – 10  
Ti 30-50% cycle  
Back up rate = Resting rate - 4

Limited respiratory polygraphy including oximetry-capnometry  
Satisfactory control of nocturnal hypoventilation (mean nocturnal SpO<sub>2</sub> >88% and a fall or rise <0.5kPa in tcCO<sub>2</sub>) and abolition of obstructive events?

No

Increase Vte by 10% to improve hypoventilation  
Titrate EPAP to abolish obstructive events (max 16)

No

Increase IPAP by 10% to improve hypoventilation  
Titrate EPAP to abolish obstructive events (max 16)

Yes

Discharge

## Titration

IPAP – 10% to nearest 1cmH<sub>2</sub>O  
Vte – 10% to nearest 10ml  
EPAP – 1cmH<sub>2</sub>O steps with tandem increase in IPAP (1cmH<sub>2</sub>O) or Vte (5-10%)

## Aims

Mean nocturnal SpO<sub>2</sub> >88%  
Fall or rise <0.5kPa in tcCO<sub>2</sub>  
No snoring / upper airways obstruction
